# Supplementary material
Source: publisher figshare collection journal article supplement (https://acs.figshare.com/ndownloader/files/4736800)
Supplement: Supplementary file 1 [file 4736800]

data_Structure Cu5.31Zn7.69
_audit_creation_date	06-08-29
_audit_update_record	06-08-29
_chemical_formula_sum	'Cu5.31Zn7.69'
_chemical_formula_weight	840.20
_cell_length_a	 8.8601(5)
_cell_length_b	 8.8601(5)
_cell_length_c	 8.8601(5)
_cell_angle_alpha	90.000
_cell_angle_beta	90.000
_cell_angle_gamma	90.000
_symmetry_int_tables_number	217
_symmetry_space_group_name_H-M	'I -4 3 m'
_symmetry_space_group_name_Hall	'I_-4_2_3'

loop_
_symmetry_equiv_pos_site_id
_symmetry_equiv_pos_as_xyz
1 'x, y, z'
2 'y, -x, -z'
3 '-x, -y, z'
4 '-y, x, -z'
5 '-x, z, -y'
6 'x, -y, -z'
7 '-x, -z, y'
8 '-z, -y, x'
9 '-x, y, -z'
10 'z, -y, -x'
11 'z, x, y'
12 'y, z, x'
13 '-y, -z, x'
14 'z, -x, -y'
15 '-y, z, -x'
16 '-z, -x, y'
17 '-z, x, -y'
18 'y, -z, -x'
19 '-y, -x, z'
20 'y, x, z'
21 'x, -z, -y'
22 'x, z, y'
23 '-z, y, -x'
24 'z, y, x'
25 '0.500+x, 0.500+y, 0.500+z'
26 '0.500+y, 0.500-x, 0.500-z'
27 '0.500-x, 0.500-y, 0.500+z'
28 '0.500-y, 0.500+x, 0.500-z'
29 '0.500-x, 0.500+z, 0.500-y'
30 '0.500+x, 0.500-y, 0.500-z'
31 '0.500-x, 0.500-z, 0.500+y'
32 '0.500-z, 0.500-y, 0.500+x'
33 '0.500-x, 0.500+y, 0.500-z'
34 '0.500+z, 0.500-y, 0.500-x'
35 '0.500+z, 0.500+x, 0.500+y'
36 '0.500+y, 0.500+z, 0.500+x'
37 '0.500-y, 0.500-z, 0.500+x'
38 '0.500+z, 0.500-x, 0.500-y'
39 '0.500-y, 0.500+z, 0.500-x'
40 '0.500-z, 0.500-x, 0.500+y'
41 '0.500-z, 0.500+x, 0.500-y'
42 '0.500+y, 0.500-z, 0.500-x'
43 '0.500-y, 0.500-x, 0.500+z'
44 '0.500+y, 0.500+x, 0.500+z'
45 '0.500+x, 0.500-z, 0.500-y'
46 '0.500+x, 0.500+z, 0.500+y'
47 '0.500-z, 0.500+y, 0.500-x'
48 '0.500+z, 0.500+y, 0.500+x'

loop_
_atom_site_label
_atom_site_type_symbol
_atom_site_fract_x
_atom_site_fract_y
_atom_site_fract_z
_atom_site_occupancy
_atom_site_symmetry_multiplicity
_atom_site_Wyckoff_symbol
_atom_site_attached_hydrogens
_atom_site_calc_flag
_atom_site_thermal_displace_type
_atom_site_u_iso_or_equiv
M1 Cu  0.82690(5)  0.82690(5)  0.82690(5) ? 8 c ? d Uiso  0.0130(3)
M2 Zn  0.10792(6)  0.10792(6)  0.10792(6) ? 8 c ? d Uiso  0.0137(2)
M3 Cu 0.35592(6)  0.0000  0.0000 ? 12 e ? d Uiso  0.0155(2)
M4 Cu  0.31190(6)  0.31190(6)  0.03680(7)  0.06(1) 24 g ? d Uiso  0.0167(4)
M4 Zn  0.31190(6)  0.31162(6)  0.03680(7)  0.94 24 g ? d Uiso  0.0167(4)
